# Supplementary material for: Clonal selection in the human Vδ1 T cell repertoire indicates γδ TCR-dependent adaptive immune surveillance
Source: PubMed Central journal article supplement (PMC5337994; doi:10.1038/ncomms14760), 2017-03-01
Supplement: ncomms14760-s1.pdf [file ncomms14760-s1.pdf]

A

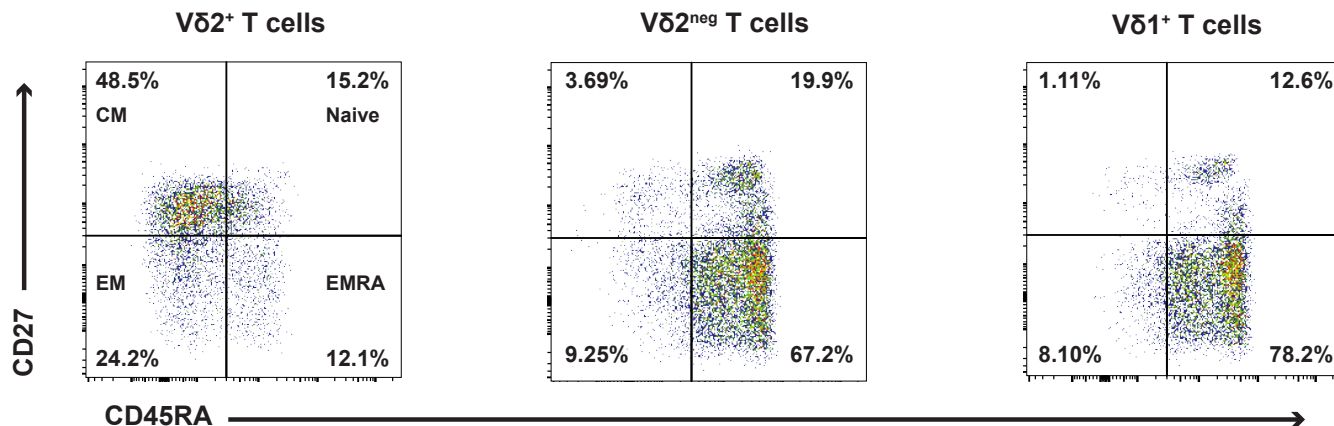

B

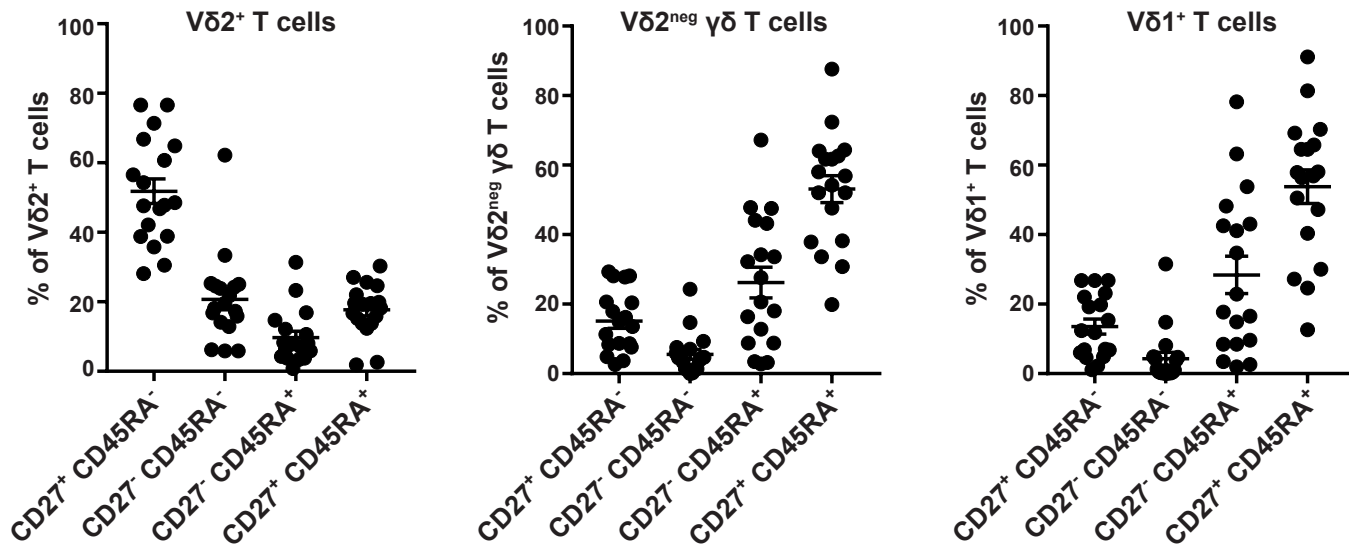

**Supplementary Figure 1: Memory phenotype of peripheral blood  $\gamma\delta$  T cells populations. A and B.** Representative flow cytometry plots and graphs show CD27 and CD45RA T cell memory marker expression on gated populations of CD3<sup>+</sup>  $\alpha\beta$ <sup>neg</sup>  $\gamma\delta$  T cells: Vδ2<sup>+</sup>, Vδ2<sup>neg</sup> and Vδ1<sup>+</sup> T cells. Flow cytometry plots are from one donor and are representative of the graphed data, n=18.

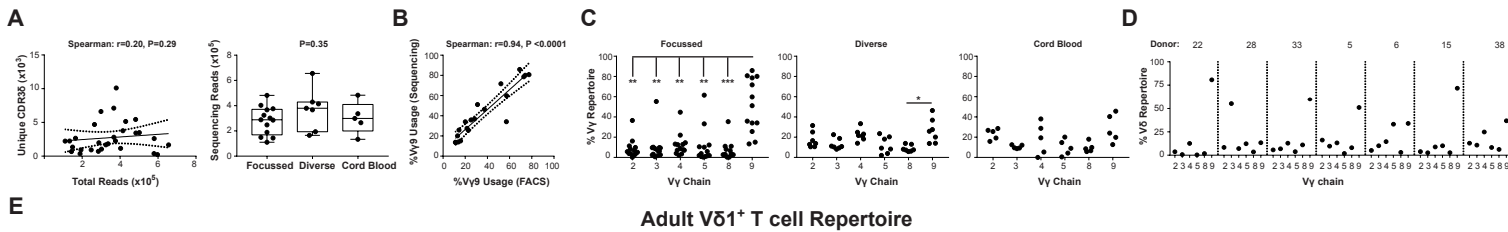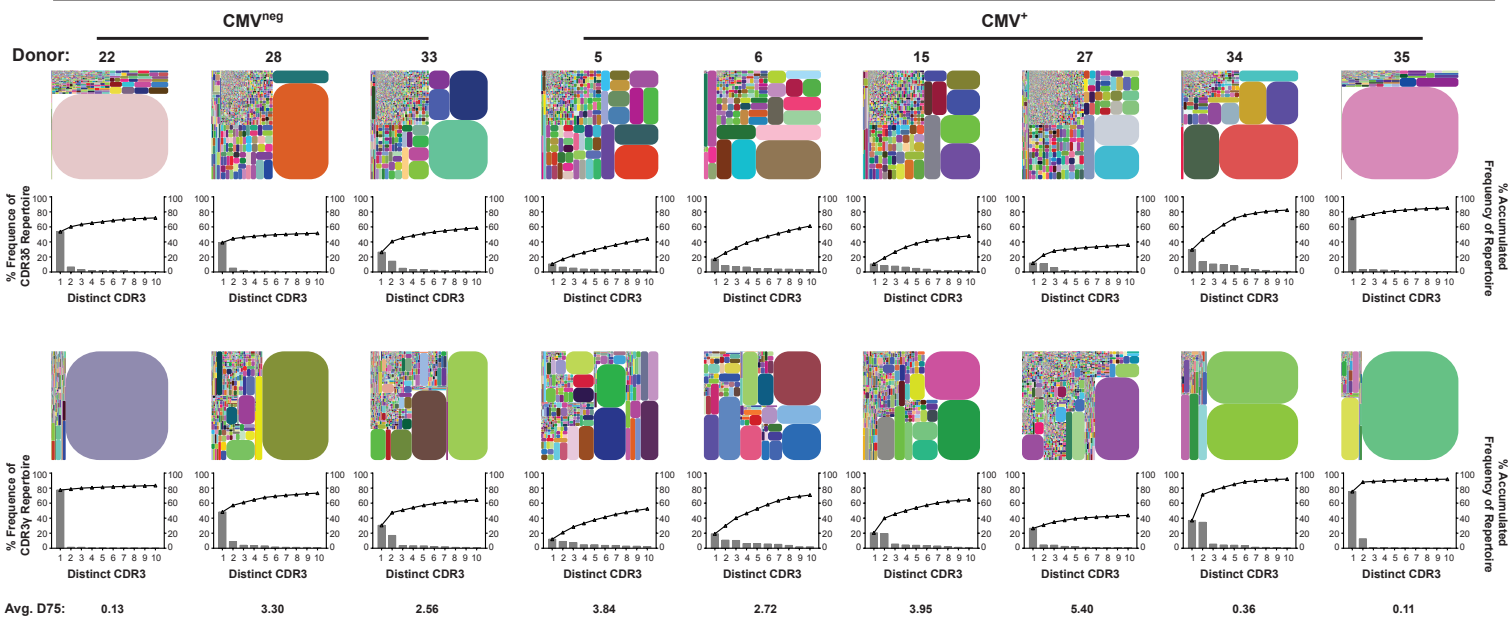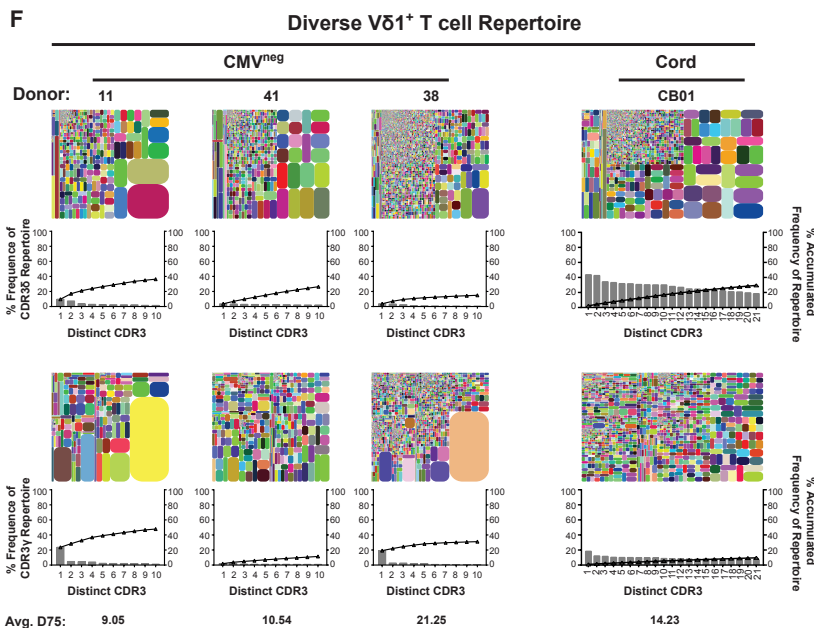

**Supplementary Figure 2: Clonotypic focussing in the V $\delta$ 1<sup>+</sup> T cell compartment.** **A.** Comparison of total sequencing reads against the number of unique CDR3s determined for each donor,  $n=25$  (left) and the mean  $\pm$ SEM of total sequencing reads for each donor grouping (right), focused ( $n=13$ ), diverse ( $n=7$ ) and cord blood ( $n=5$ ). Data analysed by one-way ANOVA. **B.** Correlation of V $\gamma$ 9 frequency in V $\delta$ 1<sup>+</sup> T cells obtained by TCR-repertoire sequencing and flow cytometry for each donor ( $n=20$ ). **C.** Grouped V $\gamma$  chain usage in V $\delta$ 1<sup>+</sup> TCR repertoire sequencing for each donor, focused ( $n=13$ ), diverse ( $n=7$ ), and cord blood ( $n=5$ ) donors. Data were analysed by Kruskal-Wallis ANOVA with Dunn's post-test comparisons, \*  $P<0.05$ , \*\*  $P<0.01$  and \*\*\*  $P<0.001$ . **D.** V $\gamma$  chain usage by V $\delta$ 1<sup>+</sup> T cells from remaining donors not shown in Fig. 2. **E** and **F.** Additional data from adult focussed (**E**), and adult diverse and cord (**F**) donor groupings.

These show tree maps of CDR3 $\gamma$  and  $\delta$  clonotype usage in relation to repertoire size (each CDR3 colour is chosen randomly and does not match between plots) and graphs showing the individual clone frequency (left y-axis) and the accumulated frequency for the first 10 most prevalent clonotypes (right y-axis), for the donors not shown in Fig 2B, E and Fig 3E.

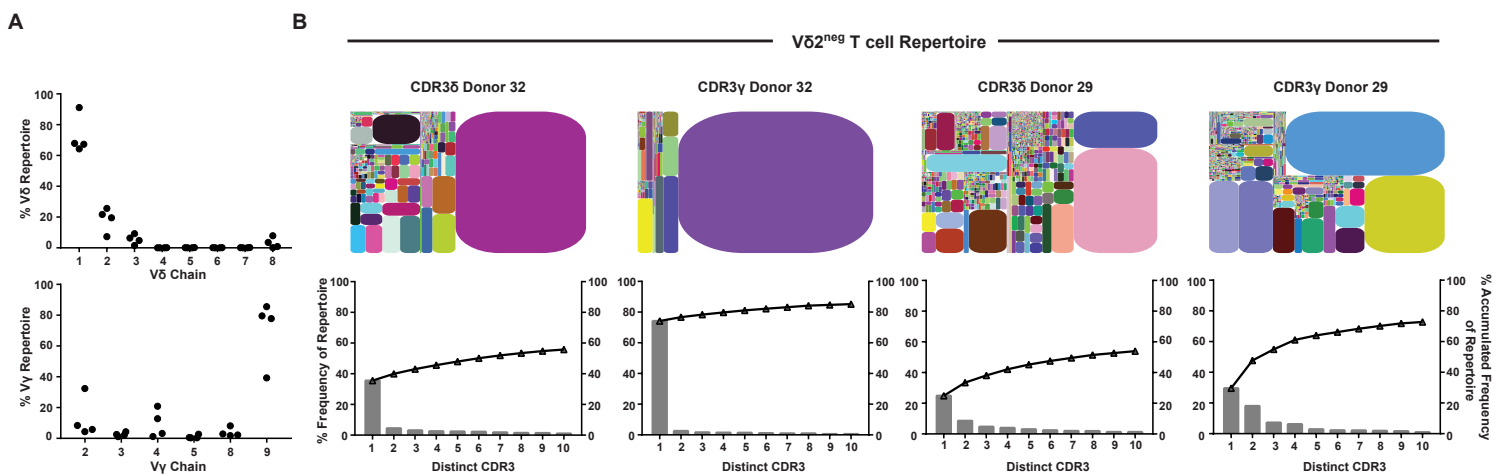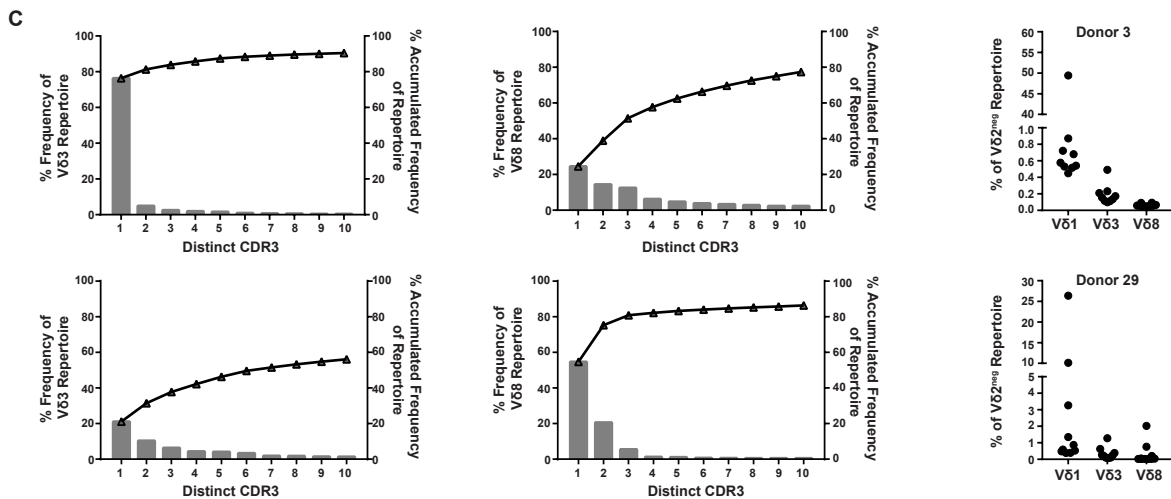

**Supplementary Figure 3:  $\gamma\delta$  TCR repertoire analysis of adult Vδ<sup>2neg</sup>  $\gamma\delta$  T cells. **A.** V $\gamma$  and Vδ chain usage in Vδ<sup>2neg</sup> TCR repertoire data from 4 individuals. **B.** Tree maps showing CDR3 clonotype usage in the Vδ<sup>2neg</sup>  $\gamma\delta$  subset in relation to repertoire size and graphs show individual clone frequency against accumulated frequency for the top 10 most prevalent clonotypes. Data are representative of 4 individuals. **C.** Accumulated frequency plots for Vδ<sub>3</sub> and Vδ<sub>8</sub> clonotypes detected within the Vδ<sup>2neg</sup>  $\gamma\delta$  repertoire (left and middle) and a comparison frequency of the top 10 clones in each of Vδ<sub>1</sub>, Vδ<sub>3</sub>, Vδ<sub>8</sub> filtered repertoires (right). Data are from 2 different donors.**

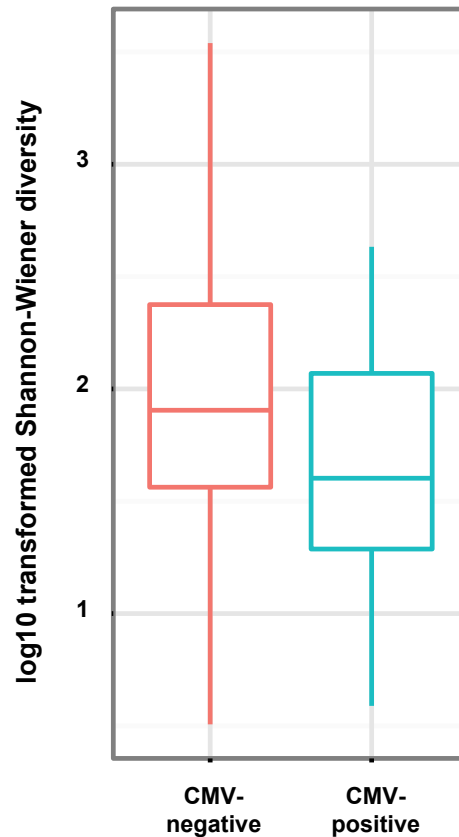

**Supplementary Figure 4: CDR3 $\delta$ 1 diversity in CMV<sup>+</sup> and CMV<sup>neg</sup> donors.** Box plots show mean  $\pm$ SD of the Shannon-Wiener index of CDR3 $\delta$ 1 diversity in CMV-seronegative (n=10) and CMV-seropositive (n=10) donor TCR repertoires, with differences between groups measured by students t-test, but not significant; p= 0.15.

A

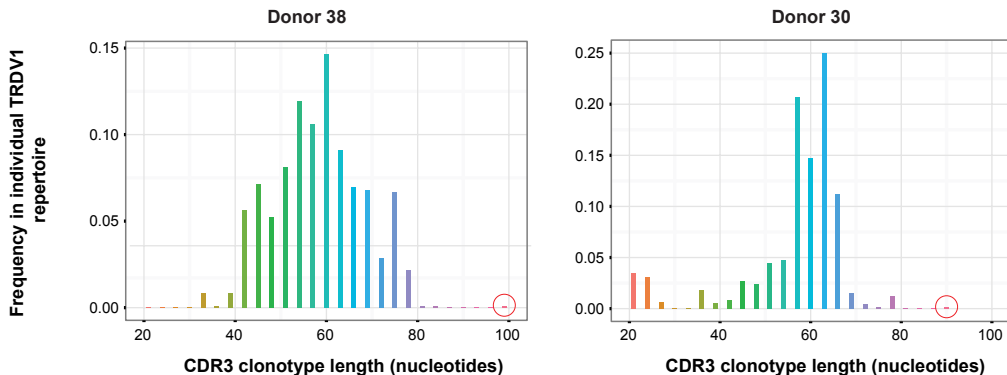

B

IMGT Junction analysis of well-represented extra-long TRDV1-TRDJ1 CDR3 sequences

| Donor | Reads, count | Reads, % | CDR3 nucleotide sequence: <b>V-Region</b> <b>N-insertions</b> <b>P-insertions</b> <b>TRDD1</b> <b>TRDD2</b> <b>TRDD3</b> <b>J-Region</b> | Length, nt | N/P nt |
|-------|--------------|----------|------------------------------------------------------------------------------------------------------------------------------------------|------------|--------|
| 6     | 32           | 0.048%   | <b>TGTGCTCTTGGGGAAC</b> GGTCCGCCTCCGGCGGT <b>CTTCC</b> AAGGAT <b>CTGTGGGGATAC</b> ACGGAGGT <b>ACACCGATAAACTCATCTTT</b>                   | 87         | 33     |
| 30    | 88           | 0.115%   | <b>TGTGCTCTTGGGGAAT</b> GGCCCC <b>CTAC</b> TCTTGTCTCAAGCACAACTTGAT <b>CTGTGGGGATAC</b> CCCCGGGAATTAGC <b>TAAACTCATCTTT</b>               | 90         | 45     |
| 31    | 193          | 0.076%   | <b>TGTGCTCTTGGGGAAT</b> AGAAGA <b>TTCCTA</b> TATGGTGGACTTCTTTGGGGGAAA <b>CTGTGGGGATAC</b> ACCGGACCGAT <b>ACACCGATAAACTCATCTTT</b>        | 90         | 40     |
| 38    | 185          | 0.109%   | <b>TGTGCTCTTGGGGAAC</b> CCCCCCAGAGATTACGC <b>CTGTGGGGATAC</b> TCAAAGAAGTTTCATCCAGAGGTCCAGGGGGCTGT <b>ACACCGATAAACTCATCTTT</b>            | 99         | 52     |
| 32    | 60           | 0.050%   | <b>TGTGCTCTTGGGGAAT</b> GTCCCTGCC <b>TCTAC</b> TGGCCCGAGGATAAGAGGATGT <b>CTGTGGGGATAC</b> SACATACTCCCACT <b>ACACCGATAAACTCATCTTT</b>     | 93         | 45     |
| 11    | 19           | 0.047%   | <b>TGTGCTCTTGGGGAAC</b> TAACTGGCAGATAC <b>CTTCTCTAC</b> TGGCCGGGGCC <b>CTGTGGGGATAC</b> GGCCTTTCGGGT <b>ACACCGATAAACTCATCTTT</b>         | 93         | 37     |

**Supplementary Figure 5: CDR3 $\delta$ 1 contain rare, unusually long functional sequences. A.** Selected normalised spectratypes from two donors with notable extra-long CDR3 variants, shown with red circles, representative of 6 individuals. **B.** Selected well-represented extra-long TRDV1-TRDJ1 CDR3 sequences, showing actual read count in raw repertoire sequencing, % of total sequencing reads, overall length of CDR3 region (nt) and total N/P nucleotide addition in each sequence.

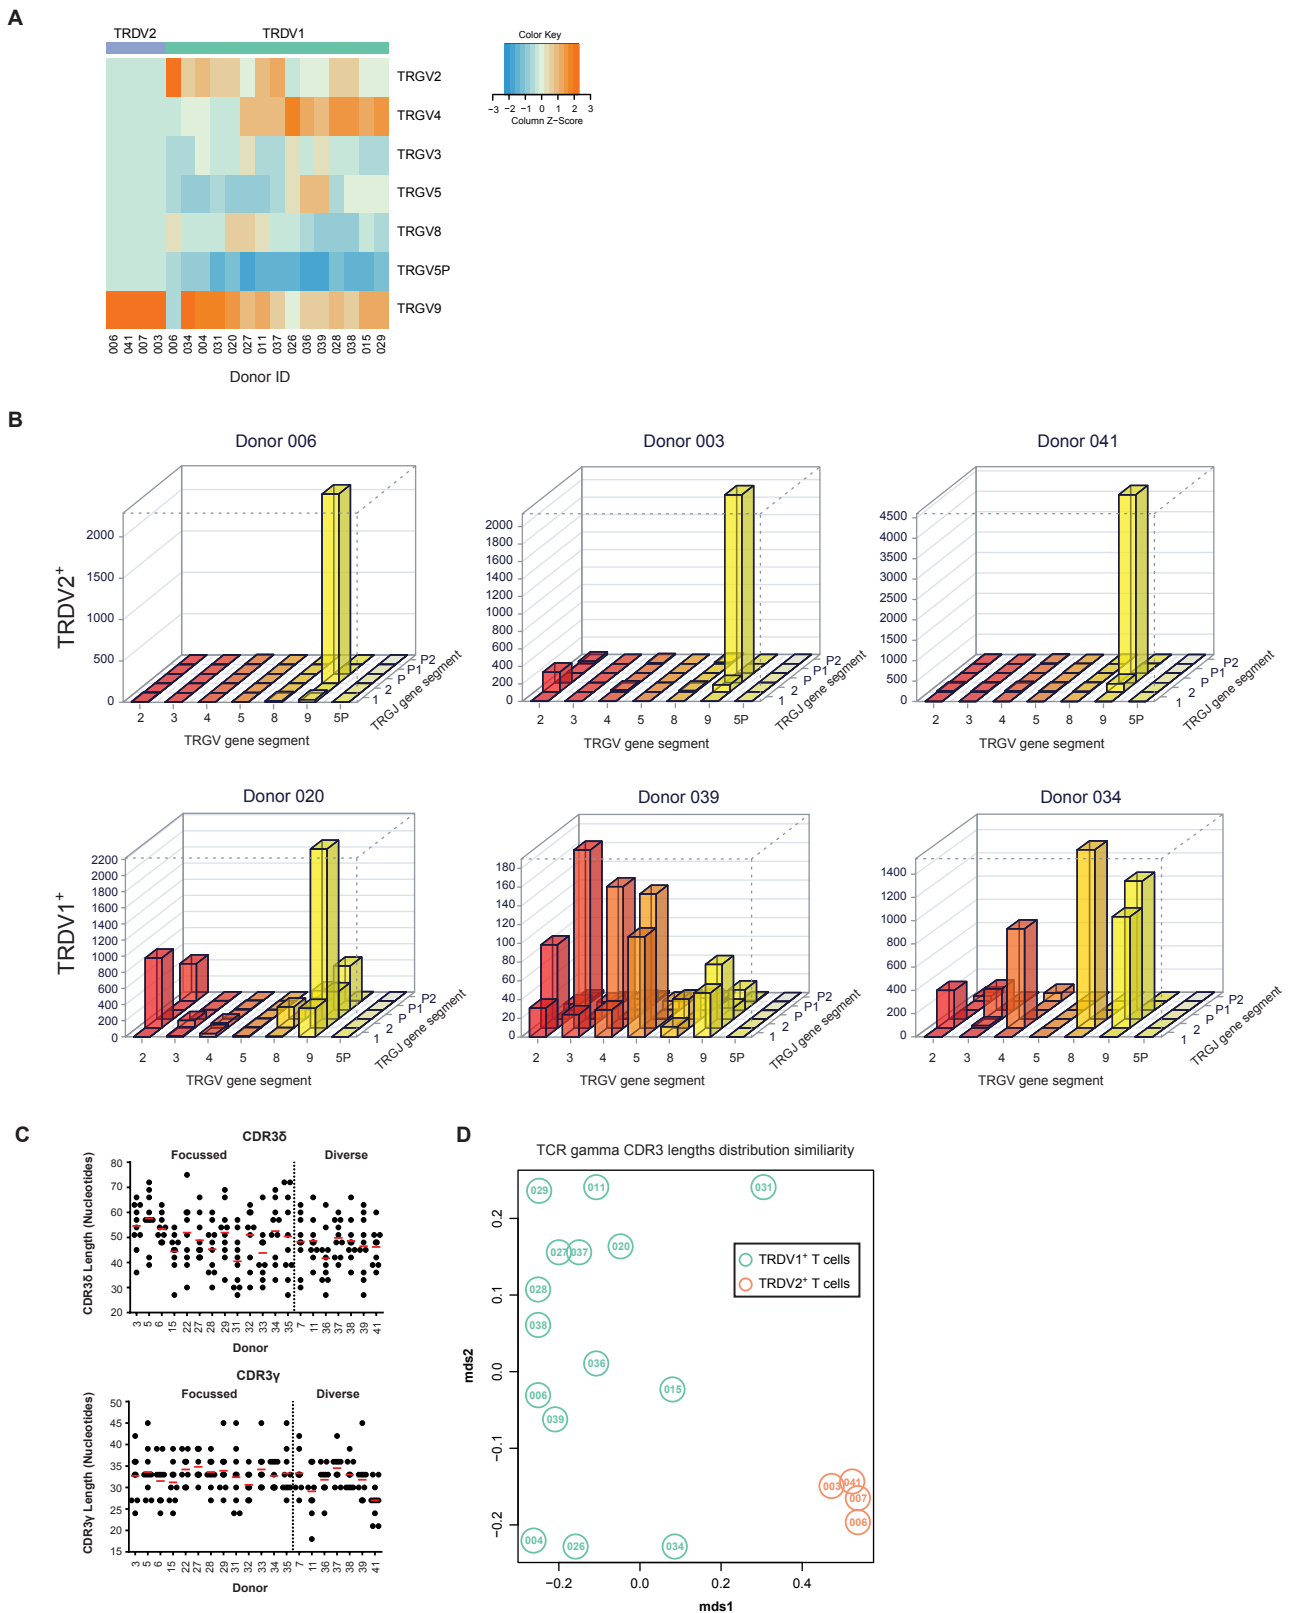

**Supplementary Figure 6: TCR $\gamma$  characteristics for V $\delta$ 1<sup>+</sup> and V $\delta$ 2<sup>+</sup>  $\gamma\delta$  T cells. **A.** Normalised V $\gamma$  gene segment usage in V $\delta$ 1<sup>+</sup> and V $\delta$ 2<sup>+</sup>  $\gamma\delta$  TCR repertoires. **B.** 3D representation of typical V $\gamma$ -J $\gamma$  gene segment usage in V $\delta$ 2<sup>+</sup> (top row; showing 3 representative donors out of 4) and V $\delta$ 1<sup>+</sup> (bottom row; showing 3 representative donors out of 20)  $\gamma\delta$  T cells, calculated per sequencing read (non-normalised). **C.** Length distribution and mean (red line) of the top 10 most prevalent clonotypes in CDR3 $\delta$  (bottom left) and CDR3 $\gamma$  (bottom right) from indicated V $\delta$ 1<sup>+</sup> T cell donors not shown in Fig 4D. **D.** Jensen-Shannon divergence between non-normalised TCR $\gamma$  repertoires in V $\delta$ 1<sup>+</sup> and V $\delta$ 2<sup>+</sup> subsets based on the CDR3 amino acid sequence length, 2D representation of multidimensional clustering (VDJ Tools software).**

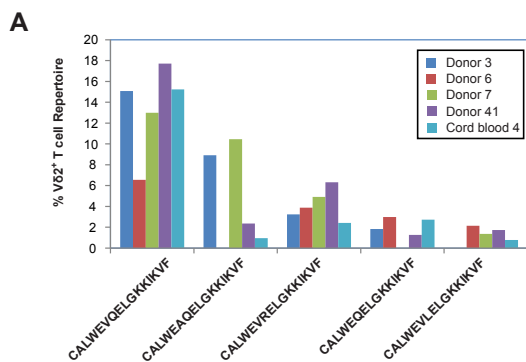

**B**

| Donor 3              | %    | Donor 6            | %    | Donor 7          | %    | Donor 41          | %    | Cord blood 4     | %    |
|----------------------|------|--------------------|------|------------------|------|-------------------|------|------------------|------|
| CALWEVQELGKKIKVF     | 15.1 | CALWETQELGKKIKVF   | 22.9 | CALWEVQELGKKIKVF | 13.0 | CALWEVQELGKKIKVF  | 17.7 | CALWEVQELGKKIKVF | 15.2 |
| CALWEAQELGKKIKVF     | 8.9  | CALWEVRKELGKKIKVF  | 18.5 | CALWEAQELGKKIKVF | 10.5 | CALWEVRELGKKIKVF  | 6.3  | CALWEAQELGKKIKVF | 2.7  |
| CATWDGGYYKKLF        | 5.9  | CALWEVQELGKKIKVF   | 6.6  | CALWEVRELGKKIKVF | 4.9  | CALWEVRELGKKIKVF  | 5.5  | CALWEVRELGKKIKVF | 2.4  |
| CALWEVRELGKKIKVF     | 3.2  | CALWEVRELGKKIKVF   | 3.9  | CASPELFYKKLF     | 3.8  | CALWEVRELGKKIKVF  | 3.4  | CALWEVRELGKKIKVF | 1.5  |
| CALWEGKQELGKKIKVF    | 2.1  | CALWEVLSQELGKKIKVF | 3.4  | CALWEVKELGKKIKVF | 2.4  | CALWEVRELGKKIKVF  | 2.4  | CALWEVRELGKKIKVF | 1.0  |
| CALWEQELGKKIKVF      | 1.8  | CALWEQELGKKIKVF    | 3.0  | CALWQELGKKIKVF   | 1.8  | CALWEVLELGGIKVF   | 1.7  | CALWEVLELGGIKVF  | 0.9  |
| CALWTAQELGKKIKVF     | 1.7  | CALWEVQGLGKKIKVF   | 2.3  | CALWEVRELGKKIKVF | 1.6  | CALWSTELGKKIKVF   | 1.6  | CALWEELGKKIKVF   | 0.8  |
| CALWEVHPGVFELGKKIKVF | 1.4  | CALWEVLELGGIKVF    | 2.1  | CALWEVLELGGIKVF  | 1.4  | CALWEVPELGGIKVF   | 1.6  | CALWEVLELGGIKVF  | 0.8  |
| CALWETSWELGKKIKVF    | 1.4  | CALWENPKLGKKIKVF   | 2.0  | CALWEVHELGKKIKVF | 1.2  | CALWEVHRELGKKIKVF | 1.6  | CATWDRNYKKLF     | 0.8  |
| CALWEELGKKIKVF       | 1.4  | CALWEVEELGKKIKVF   | 1.7  | CALWEVEELGKKIKVF | 1.2  | CALWEQELGKKIKVF   | 1.3  | CALWELGKKIKVF    | 0.8  |

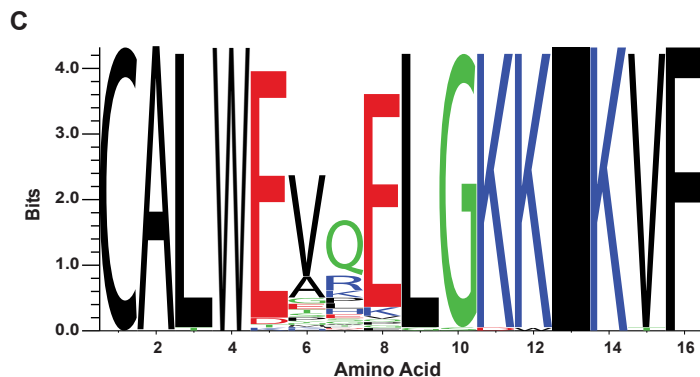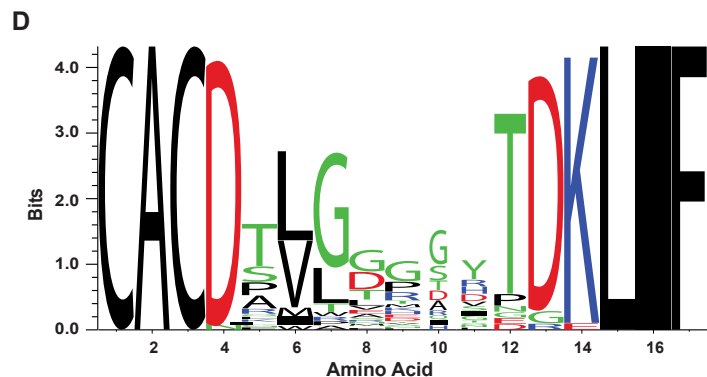

**Supplementary Figure 7: Public Vy9 sequences from Vδ2<sup>+</sup> γδ T cells. A and B.** Analysis of frequency (A) and sequence identity (B) of CDR3<sub>γ</sub> sequences from sorted Vδ2<sup>+</sup> γδ T cells from four healthy adult donors and one cord blood. **C and D.** Visual representation of amino acid enrichment at each position of CDR3<sub>γ</sub> (C) and CDR3<sub>δ</sub> (D) sequences from Vδ2<sup>+</sup> γδ T cells. Analysis was confined to the 20 most abundant CDR3<sub>γ</sub> of 14 amino acids from each of 4 adult donors, or ten most abundant CDR3<sub>δ</sub>2 sequences using Vδ2-Jδ1 of 13-15 amino acids length.

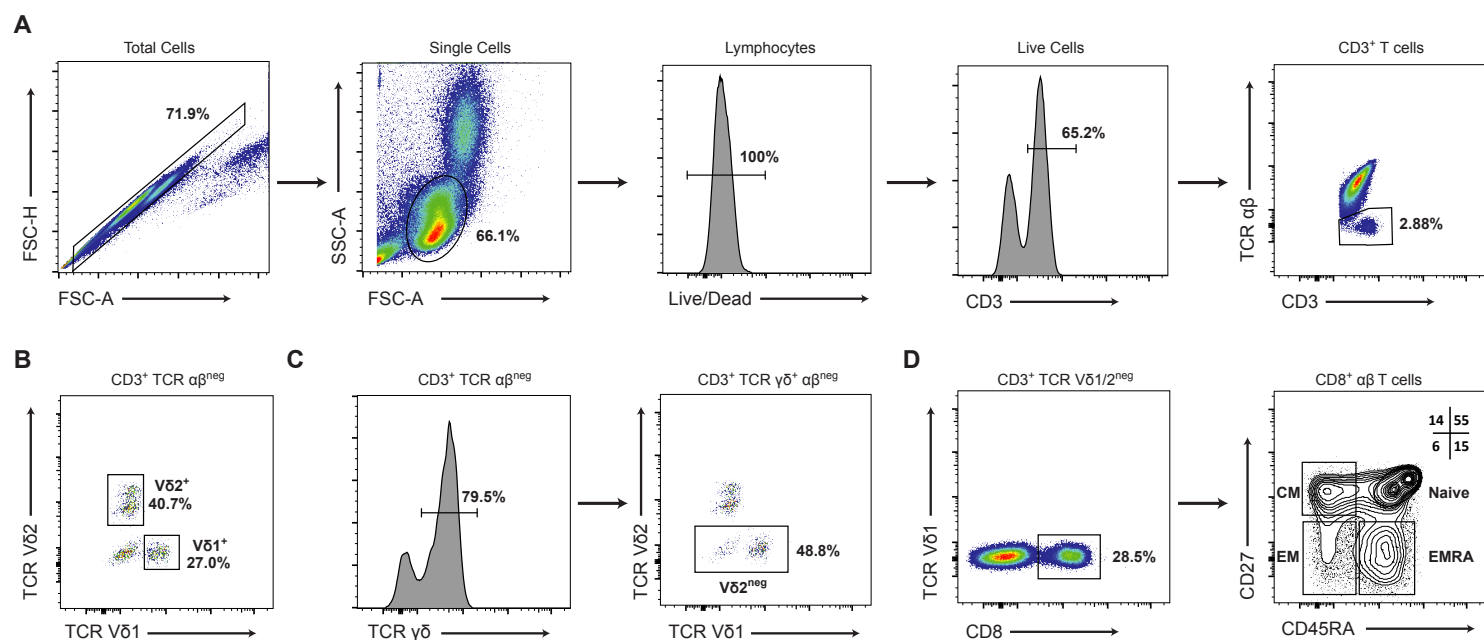

**Supplementary Figure 8: Gating strategy for identifying and sorting T cells.** **A.** Representative flow cytometry plots show the gating strategy used to identify single/live/lymphocytes and  $CD3^+ TCR \alpha\beta^{neg}$  T cells. **B** and **C.** Using the gating strategy in **A.**,  $V\delta 1^+$  and  $V\delta 2^+$  (**B**) and  $V\delta 2^{neg} \gamma\delta$  T cells (**C**) were sorted with TCR specific antibodies from  $CD3^+ TCR \alpha\beta^{neg}$  T cells. **D.**  $CD8^+ \alpha\beta$  T cells were identified by gating single/live/lymphocytes and  $CD3^+$  T cells (as shown in **A.**), selecting  $TCR V\delta 1/V\delta 2^{neg}$  cells and gating  $CD8^+$  T cells (left).  $CD27$  and  $CD45RA$  were used to define memory T cell populations (Naive, central memory; CM, effector memory; EM and effector memory  $CD45RA$ -revertants; EMRA) within  $CD8^+ \alpha\beta$  T cells (right). Flow cytometry plots are representative of 20 donors.



| Donor     | TCR Chain | Sequencing Reads | Total CDR3 | Unique CDR3 | Cell Numbers (x 10 <sup>3</sup> ) |
|-----------|-----------|------------------|------------|-------------|-----------------------------------|
| 3         | TRD       | 247354           | 215495     | 936         | 25                                |
|           | TRG       | 489350           | 420583     | 657         | 25                                |
| 5         | TRD       | 301692           | 270866     | 1042        | 7.6                               |
|           | TRG       | 249187           | 227705     | 643         | 7.6                               |
| 6         | TRD       | 188791           | 161794     | 359         | 7.2                               |
|           | TRG       | 294125           | 284516     | 289         | 7.2                               |
| 7         | TRD       | 164806           | 140173     | 2650        | 25                                |
|           | TRG       | 455352           | 396695     | 1789        | 25                                |
| 11        | TRD       | 193606           | 175261     | 936         | 25                                |
|           | TRG       | 227924           | 208569     | 372         | 25                                |
| 15        | TRD       | 324650           | 308838     | 1676        | 25                                |
|           | TRG       | 267362           | 260771     | 780         | 25                                |
| 20        | TRD       | 395517           | 371202     | 2051        | 25                                |
|           | TRG       | 437885           | 415557     | 816         | 25                                |
| 22        | TRD       | 143487           | 142436     | 684         | 25                                |
|           | TRG       | 389641           | 342630     | 390         | 25                                |
| 26        | TRD       | 359679           | 349164     | 7004        | 25                                |
|           | TRG       | 562324           | 536932     | 3023        | 25                                |
| 27        | TRD       | 481992           | 457103     | 5443        | 25                                |
|           | TRG       | 687234           | 635982     | 2826        | 25                                |
| 28        | TRD       | 110158           | 102974     | 2230        | 25                                |
|           | TRG       | 125384           | 107150     | 563         | 25                                |
| 29        | TRD       | 288125           | 266648     | 1985        | 25                                |
|           | TRG       | 611184           | 599058     | 1195        | 25                                |
| 31        | TRD       | 375423           | 350112     | 2253        | 25                                |
|           | TRG       | 669944           | 645027     | 1356        | 25                                |
| 32        | TRD       | 149139           | 134080     | 1339        | 25                                |
|           | TRG       | 463039           | 449407     | 928         | 25                                |
| 33        | TRD       | 366993           | 355469     | 2804        | 25                                |
|           | TRG       | 341720           | 308335     | 1273        | 25                                |
| 34        | TRD       | 402725           | 354764     | 1156        | 25                                |
|           | TRG       | 439176           | 403286     | 587         | 25                                |
| 35        | TRD       | 285454           | 284419     | 717         | 25                                |
|           | TRG       | 599028           | 563321     | 497         | 25                                |
| 36        | TRD       | 379719           | 359488     | 10111       | 25                                |
|           | TRG       | 346823           | 309217     | 3341        | 25                                |
| 37        | TRD       | 414550           | 385585     | 3763        | 25                                |
|           | TRG       | 214117           | 185311     | 1522        | 25                                |
| 38        | TRG       | 147841           | 131069     | 1988        | 25                                |
|           | TRD       | 429142           | 395512     | 5140        | 25                                |
| 39        | TRG       | 186273           | 179643     | 2758        | 25                                |
|           | TRD       | 366753           | 345628     | 7117        | 25                                |
| 41        | TRG       | 538556           | 472281     | 804         | 25                                |
|           | TRD       | 655818           | 636919     | 1665        | 25                                |
| CB01      | TRD       | 133686           | 124265     | 2248        | 7.1                               |
|           | TRG       | 252978           | 225747     | 1662        | 7.1                               |
| CB03      | TRD       | 265021           | 254917     | 4696        | 11.4                              |
|           | TRG       | 205191           | 188284     | 2085        | 11.4                              |
| CB04      | TRD       | 298887           | 284049     | 6613        | 25                                |
|           | TRG       | 181574           | 157254     | 3467        | 25                                |
| CB05      | TRG       | 203485           | 189804     | 920         | 7                                 |
|           | TRD       | 336556           | 326726     | 1827        | 7                                 |
| CB06      | TRG       | 500765           | 430652     | 1066        | 5.2                               |
|           | TRD       | 483213           | 471771     | 3433        | 5.2                               |
| 31-CD27hi | TRG       | 457510           | 417978     | 1018        | 5                                 |
|           | TRD       | 579591           | 559376     | 2604        | 5                                 |
| 31-CD27lo | TRG       | 642840           | 628370     | 236         | 6.2                               |
|           | TRD       | 578810           | 551791     | 384         | 6.2                               |
| 29-CD27hi | TRG       | 436866           | 409659     | 1425        | 4                                 |
|           | TRD       | 501569           | 476057     | 3492        | 4                                 |
| 29-CD27lo | TRG       | 597053           | 534932     | 229         | 6                                 |
|           | TRD       | 516806           | 495834     | 118         | 6                                 |

**Supplementary Table 1: Details of raw sequencing data.** The table displays each sample's analysed total sequencing reads, total CDR3 assigned, unique CDR3 identified and the number of cells obtained per sample.



| germline | TRDV1<br>TRAV29/DV5 | TRDV<br>GCT CTT<br>GCA GCA AGC G | TRDD1<br>GAAATAGT | TRDD2<br>CCTTCCTAC | TRD33<br>ACTGGGGGATACG | N/P                  | TRDJ1                           | CDR3<br>length | N/P<br>nts | CMV<br>status | EBV<br>status | D75  |
|----------|---------------------|----------------------------------|-------------------|--------------------|------------------------|----------------------|---------------------------------|----------------|------------|---------------|---------------|------|
| clone    | TRDV1               | GCT CTT                          |                   |                    |                        |                      | AC ACC GAT AAA CTC ATC TRD1     | 33             | 0          |               |               |      |
| POS4     | TRDV5               | GCA GCA AGC                      | TCC               | CCTA               | GGGGGAT<br>GGGGATA     | TACAGGGT             | CT TTG ACA GCA CAA CTC TTC TRD2 | 48             | 14         |               |               |      |
| LES      |                     |                                  |                   |                    |                        |                      |                                 |                |            |               |               |      |
| donor    |                     |                                  |                   |                    |                        |                      |                                 |                |            |               |               |      |
| 3        | TRDV1               | GCT CTT                          | GTGGAT            | CTAC               | ACTGGGGGATAC           | TAGGGGGA             | ACC GAT AAA CTC ATC TRD1        | 60             | 16         | +             | +             | 1.32 |
| 5        | TRDV1               | GCT CTT                          | CCTC              |                    | ACTGGGGGATAC           | AGCC                 | A CTC ATC TRD1                  | 42             | 11         | +             | +             | 3.88 |
| 6        | TRDV1               | GCT CTT                          | CGG               | CCTTC              | CTGGGGGATACG           | CCAGTACTCATA         | AC ACC GAT AAA CTC ATC TRD1     | 57             | 17         | +             | +             | 3.14 |
| 7        | TRDV1               | GCT CTT                          | TAAACGGGGT        |                    | ATACG                  | GAAGGGGGTGT          | AC ACC GAT AAA CTC ATC TRD1     | 57             | 18         | -             | +             | 1.24 |
| 11       | TRDV1               | GCT CTT                          | CCAACCCCC         | CCTAC              | CTGGGGGATAC            | TCAAG                | AA CTC ATC TRD1                 | 45             | 16         | -             | +             | 9.86 |
| 15       | TRDV1               | GCT CT                           | ATCTCACT          | TTCCTA             | ACTGGG                 | CGCTGCCCTGT          | C ACC GAT AAA CTC ATC TRD1      | 45             | 19         | +             | +             | 5.12 |
| 22       | TRDV1               | GCT CTT                          | CACCCGGCCTCCGAG   | CTAC               | ACTGGG                 | CCACC                | AC ACC GAT AAA CTC ATC TRD1     | 60             | 20         | -             | +             | 0.12 |
| 27       | TRDV1               | GCT CTT                          | A                 | CCTAC              | TGGGGGATACG            | CT                   | ACC GAT AAA CTC ATC TRD1        | 42             | 10         | +             | +             | 4.02 |
| 28       | TRDV1               | GCT CTT                          | AT                | TTC                | ACTGGGG                | CTCAG                | C GAT AAA CTC ATC TRD1          | 60             | 23         | -             | +             | 5.12 |
| 29       | TRDV1               | GCT CTT                          | AT                | TTC                | ACTGGGGGATACG          | GATCTCC              | GAT AAA CTC ATC TRD1            | 54             | 12         | -             | +             | 1.33 |
| 31       | TRDV1               | GCT CTT                          | A                 | TCT                | ACTGGGG                | TTTG                 | CT TTG ACA GCA CAA CTC TTC TRD2 | 57             | 13         | +             | -             | 0.38 |
| 32       | TRDV1               | GCT CTT                          | TTGCC GG          | CCTTCCTA           | ACTGGG                 | TCGAG                | CC GAT AAA CTC ATC TRD1         | 51             | 14         | +             | +             | 0.82 |
| 33       | TRDV1               | GCT CTT                          | AGCCGGATCGCA      | TTCCTAC            | GGGGGAT                |                      | C ACC GAT AAA CTC ATC TRD1      | 33             | 5          | -             | +             | 3.25 |
| 34       | TRDV1               | GCT CTT                          | CCGGAGGCCT        |                    | GGGGATACG              |                      | C GAT AAA CTC ATC TRD1          | 57             | 14         | +             | +             | 0.41 |
| 35       | TRDV1               | GCT CTT                          | CGGAG             |                    | TGGGG                  | CCCA                 | C ACC GAT AAA CTC ATC TRD1      | 45             | 14         | +             | +             | 0.11 |
| 36       | TRDV1               | GCT CTT                          | ACTCCC            | CCTTC              | GGGGGATA               |                      | AA CTC ATC TRD1                 | 27             | 5          | -             | -             | 24.6 |
| 37       | TRDV1               | GCT CTT                          | TCTA              | TTC                | ACTGGGGATAC            | TTCAGG               | T AAA CTC ATC TRD1              | 51             | 19         | +             | +             | 11.6 |
| 38       | TRDV1               | GCT CTT                          | GGTATCGGACC       |                    | CTGGGGGATAC            | TGGGGCATGTCCCACTC GT | AC ACC GAT AAA CTC ATC TRD1     | 69             | 25         | -             | +             | 17   |
| 39       | TRDV1               | GCT CTT                          | AACCCGGGAGA       | CCTTCCTA           | ACTGGG                 | ACCCCCC              | C ACC GAT AAA CTC ATC TRD1      | 60             | 19         | +             | +             | 24.2 |
| 41       | TRDV1               | GCT CTT                          |                   |                    | ACTGGG                 | AAACGT               | AC ACC GAT AAA CTC ATC TRD1     | 60             | 20         | -             | -             | 14.5 |
|          |                     |                                  |                   |                    |                        |                      | average                         | 51.6           | 15.5       |               |               |      |
|          |                     |                                  |                   |                    |                        |                      | range                           | 27-69nt        | 5-25nt     |               |               |      |

**Supplementary Table 3: Prevalent CDR3δ1 sequences are complex and private.** The most prevalent TCRδ1 clonotype sequence from each adult donor. Sequences were analysed using IMG-T Junction Analysis, which identified V, D, and J gene segments used, and highlighted N (red) and P (blue) nucleotides. The CDR3δ1 length, number of N/P nucleotides, CMV/EBV status of each donor, and TCRδ diversity (D75) is shown.

| germline | TRGV    |        | CDR3 $\gamma$ | TRGJ        |           |              |        |        |
|----------|---------|--------|---------------|-------------|-----------|--------------|--------|--------|
|          |         |        |               | NYYKKLF     | TRGJ1/2   |              |        |        |
|          | TRGV2-8 | CATWDG |               | GQELGKKIKVF | TRGJP*01  |              |        |        |
|          | TRGV9   | CALWEV |               | TTGWFKIF    | TRGJP1*01 |              |        |        |
|          |         |        |               | SSDWIKTF    | TRGJP2*01 |              |        |        |
|          |         |        |               |             |           | CDR3         | CMV    | EBV    |
| clone    |         |        |               |             |           | length(aa)   | status | status |
| POS4     | TRGV8   | CATWD  |               | TTGWFKIF    | TRGJP1*01 | 11           | +      | ?      |
| LES      | TRGV4   | CATWDG | F             | YYKKLF      | TRGJ1/2   | 11           | +      | ?      |
| donor    |         |        |               |             |           |              |        |        |
| 29       | TRGV2   | CATWDG | S             | YYKKLF      | TRGJ1/2   | 11           | -      | +      |
| 37       | TRGV2   | CATWD  | ALG           | YYKKLF      | TRGJ1/2   | 12           | +      | -      |
| 7        | TRGV3   | CATWD  | RRPN          | SDWIKTF     | TRGJP2*01 | 14           | -      | +      |
| 28       | TRGV3   | CATWD  | RIF           | YKKLF       | TRGJ1/2   | 11           | -      | +      |
| 39       | TRGV3   | CATWD  | RPE           | KLF         | TRGJ1/2   | 9            | +      | +      |
| 27       | TRGV4   | CATWDG | REG           | YKKLF       | TRGJ1/2   | 12           | +      | +      |
| 6        | TRGV5   | CATW   | FLVG          | KLF         | TRGJ1/2   | 9            | +      | +      |
| 31       | TRGV5   | CATW   | VH            | KKLF        | TRGJ1/2   | 8            | +      | -      |
| 3        | TRGV9   | CALW   | GNL           | YYKKLF      | TRGJ1/2   | 11           | +      | +      |
| 5        | TRGV9   | CALWE  | RG            | LGKKIKVF    | TRGJP*01  | 13           | +      | +      |
| 11       | TRGV9   | CAL    | SQRS          | NYYKKLF     | TRGJ1/2   | 12           | -      | +      |
| 15       | TRGV9   | CALW   | SHP           | YYKKLF      | TRGJ1/2   | 11           | +      | +      |
| 22       | TRGV9   | CALWEV | AGH           | YKKLF       | TRGJ1/2   | 12           | -      | +      |
| 32       | TRGV9   | CALWEV |               | YYKKLF      | TRGJ1/2   | 10           | -      | +      |
| 33       | TRGV9   | CALWEV | Q             | TGWFKIF     | TRGJP1*01 | 12           | -      | +      |
| 34       | TRGV9   | CALWE  | DS            | YYKKLF      | TRGJ1/2   | 11           | +      | +      |
| 35       | TRGV9   | CALWEV | HIGS          | NYYKKLF     | TRGJ1/2   | 15           | +      | +      |
| 36       | TRGV9   | CAL    | SPS           | KKLF        | TRGJ1/2   | 8            | -      | -      |
| 38       | TRGV9   | CALWE  | GNL           | NYYKKLF     | TRGJ1/2   | 11           | -      | +      |
| 41       | TRGV9   | CALW   | D             | YYKKLF      | TRGJ1/2   | 9            | -      | -      |
|          |         |        |               |             |           | average (aa) |        |        |
|          |         |        |               |             |           | 11.05        |        |        |
|          |         |        |               |             |           | range        |        |        |
|          |         |        |               |             |           | 8-15aa       |        |        |

**Supplementary Table 4: Prevalent CDR3 $\gamma$  sequences are private.** The most prevalent TCR $\gamma$  clonotype sequence from each adult donor. Sequences were analysed using IMGT Junction Analysis, which identified V, D, and J gene segments used. The CDR3 $\gamma$  length, and CMV/EBV status of each donor is shown.

| germline | TRDV  |       | CDR3 $\delta$   | TRDJ      |         |                    |               |               |
|----------|-------|-------|-----------------|-----------|---------|--------------------|---------------|---------------|
|          |       |       |                 | TDKLIF    | TRDJ1   |                    |               |               |
|          | TRDV1 | CALGE |                 | LTAQLFF   | TRDJ2   |                    |               |               |
|          | TRDV5 | CAAS  |                 | SWDTRQMFF | TRDJ3   |                    |               |               |
|          |       |       |                 | RPLIF     | TRDJ4   |                    |               |               |
| clone    |       |       |                 |           |         | CDR3<br>length(aa) | CMV<br>status | EBV<br>status |
| POS4     | TRDV1 | CALGE | LGD             | DKLIF     | TRJD1   | 11                 | +             | ?             |
| LES      | TRDV5 | CAAS  | SPIRGYTGS       | DKLIF     | TRJD1   | 16                 | +             | ?             |
| donor    |       |       |                 |           |         |                    |               |               |
| 3        | TRDV1 | CALGE | PTSSYWGILGG     | TDKLIF    | TRJD1   | 20                 | +             | +             |
| 5        | TRDV1 | CALGE | VRYWGIQP        | LIF       | TRJD1   | 14                 | +             | +             |
| 6        | TRDV1 | CALG  | DLLGDTPLVHNN    | TDKLIF    | TRJD1   | 19                 | +             | +             |
| 7        | TRDV1 | CALG  | DGLPYTEGVLY     | TDKLIF    | TRJD1   | 19                 | -             | +             |
| 11       | TRDV1 | CALG  | VKRGLGDTQE      | LIF       | TRJD1   | 15                 | -             | +             |
| 15       | TRDV1 | CAL   | QPPYALPV        | TDKLIF    | TRJD1   | 15                 | +             | +             |
| 22       | TRDV1 | CALG  | DADFPWRRLGHH    | TDKLIF    | TRJD1   | 20                 | -             | +             |
| 27       | TRDV1 | CAL   | ISLGGYA         | TDKLIF    | TRJD1   | 14                 | +             | +             |
| 28       | TRDV1 | CALG  | DTRPPSLRYWGLS   | DKLIF     | TRJD1   | 20                 | -             | +             |
| 29       | TRDV1 | CALGE | HFHTVVLGD       | TDKLIF    | TRJD1   | 18                 | -             | +             |
| 31       | TRDV1 | CALGE | HPPYWGDLP       | LTAQLFF   | TRJD2   | 19                 | +             | -             |
| 32       | TRDV1 | CALG  | LPAFLYTGFA      | DKLIF     | TRJD1   | 17                 | -             | +             |
| 33       | TRDV1 | CALGE | PGGFE           | LIF       | TRJD1   | 11                 | -             | +             |
| 34       | TRDV1 | CALGE | RRIAFLRGIR      | TDKLIF    | TRJD1   | 19                 | +             | +             |
| 35       | TRDV1 | CALGE | PGGLGAH         | DKLIF     | TRJD1   | 15                 | +             | +             |
| 36       | TRDV1 | CALGE | LGE             | LIF       | TRJD1   | 9                  | -             | -             |
| 37       | TRDV1 | CALG  | TPPSRVGGYSG     | KLIF      | TRJD1   | 17                 | +             | -             |
| 38       | TRDV1 | CALG  | DLFHWGILAHRPNSY | TDKLIF    | TRJD1   | 23                 | -             | +             |
| 39       | TRDV1 | CALGE | LVIGPWGIHPR     | TDKLIF    | TRJD1   | 20                 | +             | +             |
| 41       | TRDV1 | CALG  | NPGLPNYWETY     | TDKLIF    | TRJD1   | 20                 | -             | -             |
|          |       |       |                 |           | average | 17.2               |               |               |
|          |       |       |                 |           | range   | 9-23aa             |               |               |

**Supplementary Table 5: Prevalent CDR3 $\delta$ 1 sequences are complex and private.** The most prevalent TCR $\delta$ 1 clonotype sequence from each adult donor. Sequences were analysed using IMGT Junction Analysis, which identified V, D, and J gene segments used. The CDR3 $\delta$ 1 length (amino acids), and CMV/EBV status of each donor is shown
